# Supplementary material
Source: publisher figshare collection journal article supplement (https://tandf.figshare.com/articles/dataset/_/21829230)
Supplement: Supplementary file 1 [file 1]

Diagnoza PTSD w ICD-10 oraz w ICD-11 wśród osób starszych z doświadczeniem traumy z dzieciństwa: występowanie, struktura czynnikowa oraz symptomatologia.

Tobias Maximilian Glück, Matthias Knefel, Ulrich Stefan Tran, Brigitte Lueger-Schuster

Wprowadzenie: ICD-11 proponuje istotne zmiany w diagnozie PTSD, które wymagają badań na różnych próbach klinicznych.

Cel: Celem tej pracy było zbadanie różnic w częstości występowania oraz obrazu klinicznego PTSD w diagnozie tego zaburzenia proponowanej przez ICD-10 oraz ICD-11.

Metoda: Konfirmacyjna analiza czynnikowa oraz analiza ukrytych profili została przeprowadzona na próbie osób starszych z doświadczeniem traumy z dzieciństwa (>60 lat; n = 399).

Wyniki: Wskaźniki występowania PTSD różniły się istotnie (dla ICD-10: 15.0%; dla ICD-11: 10.3%). Wykazano jednoczynnikową strukturę PTSD w tej próbie.

Konkluzje: ICD-11 koncentruje się na symptomach PTSD o wysokiej użyteczności klinicznej.

Otwarte pytanie dotyczy tego, czy ICD-11 diagnozuje PTSD tylko w przypadku poważnych symptomów.

Słowa kluczowe: Analiza ukrytych profili; trauma w dzieciństwie; II wojna światowa; przemoc instytucjonalna; długotrwałe konsekwencje; nasilenie traumy

Name of translator: Marcin Rzeszutek, University of Finance and Management in Warsaw, Poland

**Citation:** European Journal of Psychotraumatology 2016, 7: 29700 - <http://dx.doi.org/10.3402/ejpt.v7.29700>
