# Supplementary material
Source: publisher figshare collection journal article supplement (https://tandf.figshare.com/articles/dataset/_/21829230)
Supplement: Supplementary file 2 [file 1]

Kurztitel: PTBS: ICD-10 VS ICD-11 BEI ÄLTEREN PERSONEN

*Final but unedited version*

PTBS im ICD-10 und im vorgeschlagenen ICD-11 bei älteren Personen mit Kindheitstrauma:  
Prävalenz, Faktorenstruktur und Symptomprofile

Tobias M. Glück, Matthias Knefel\*, Ulrich S. Tran und Brigitte Lueger-Schuster

Fakultät für Psychologie, Universität Wien, Liebiggasse 5, 1010-Wien, Österreich.

\*Korrespondierender Autor: Fakultät für Psychologie, Universität Wien, Liebiggasse 5, 1010-Wien, Österreich. E-Mail: [matthias.knefel@univie.ac.at](mailto:matthias.knefel@univie.ac.at); Telefon: +43-1-4277-47221

Deutsch Übersetzung von:

Glück, T. M., Knefel, M., Tran, U. S., & Lueger-Schuster, B. (2016). PTSD in ICD-10 and proposed ICD-11 in elderly with childhood trauma: prevalence, factor structure, and symptom profiles. *European Journal of Psychotraumatology*, 7.

### Abstract

**Hintergrund:** Im Vorschlag für ICD-11 werden wesentliche Änderungen für die Diagnose der Posttraumatischen Belastungsstörung (PTBS) vorgestellt, die anhand verschiedener Stichproben erforscht werden sollen.

**Ziele:** Untersuchung der Unterschiede der Prävalenz und diagnostischen Übereinstimmung der PTBS nach ICD-10 und ICD-11, der Faktorenstruktur der im ICD-11 vorgeschlagenen PTBS und der diagnostischen Nützlichkeit der Symptomschwereklassen der PTBS.

**Methoden:** Es wurden konfirmatorische Faktorenanalysen und latente Profilanalysen an Daten von älteren Überlebenden von Kindheitstrauma angewandt ( $> 60$  Jahre,  $N = 399$ ).

**Ergebnisse:** PTBS-Raten unterschieden sich signifikant zwischen ICD-10 (15.0%) und ICD-11 (10.3%,  $z = 2.02$ ,  $p = 0.04$ ). Im Gegensatz zu früheren Untersuchungen wies die einfaktorielle Lösung der PTBS nach ICD-11 in dieser Stichprobe die beste Anpassungsgüte an die Daten auf. Hohe Symptomprofile wurden mit der PTBS nach ICD-11 assoziiert.

**Schlussfolgerung:** Der ICD-11 fokussiert auf Kernsymptome der PTBS und fördert ihre klinische Nützlichkeit. Noch offene Fragen betreffen die Tendenz der ICD-11, hauptsächlich Fälle mit schwerwiegenden Symptomen zu diagnostizieren sowie den Einfluss der Art des Traumas und des Alters der Probanden auf die Faktorenstruktur.

**Interessenskonflikte:** Keine

*Schlagwörter:* Latente Klassenanalyse, Kindheitsmissbrauch, zweiter Weltkrieg, institutioneller Missbrauch, Langzeitkonsequenzen, Traumaschwere

### **Einleitung**

Die im vorgeschlagenen ICD-11 aufgeführte Klassifikation der Posttraumatischen Belastungsstörung (PTBS) zielt auf eine höhere diagnostische Spezifität, praktische Reliabilität und klinische Nützlichkeit ab (Maercker et al., 2013; Reed, 2010). Sechs Kernsymptome sind gleichmäßig auf drei Symptomgruppen aufgeteilt (3x2): Wiedererleben, Vermeidung und Hyperarousal, wobei für eine Diagnose mindestens ein Symptom in jeder Symptomgruppe vorhanden sein muss. Für ältere Erwachsene mit einer Vorgeschichte von Kindheitstrauma ist weiterhin unklar, ob (1) die vorgeschlagenen ICD-11 Kriterien der PTBS und (2) die zugrundeliegende Faktorenstruktur für diese Personen gelten und (3) wie die Symptomgewichtung die Klassifikation beeinflusst. Aus einer Entwicklungsperspektive sind Kindheitstraumata stärker mit PTBS Symptomen und einer größeren Beeinträchtigung im höheren Alter assoziiert als Traumata im Erwachsenenalter (Ogle, Rubin, & Siegler, 2013). Ebenso wurde berichtet, dass sich die Symptomkonfiguration bei älteren Personen unterscheiden kann (Averill & Beck, 2000). Nur wenige Studien untersuchten den Einfluss verschiedener Arten von Traumatisierungen auf die Symptomprofile der DSM-IV PTBS (American Psychiatric Association, 2000): Unfälle, sexueller Missbrauch und plötzlicher Todesfall in Studentenstichproben (Kelley, Weathers, McDevitt-Murphy, Eakin, & Flood, 2009; Lancaster, Melka, Rodriguez, & Bryant, 2014) und kriegs- und verbrechensbezogene Traumatisierungen (Naifeh et al., 2008). Bisher untersuchte keine der Studien diese Muster bei älteren Personen oder nutzte dafür die Kriterien des ICD. Ebenso verwendeten die Studien

keine probabilistischen Methoden, wie etwa die latente Profilanalyse (LPA), die die Validität erhöhen (Goodyer, 2012) und den Schweregrad der Symptome als latente Variable abbildet.

Mit dieser Studie wird zur laufenden Diskussion über die Klassifikation der PTBS in der vorgeschlagenen ICD-11 beigetragen, indem die Konfiguration der PTBS Symptome in zwei Stichproben von mittlerweile älteren Überlebenden von Kindheitstraumata (kriegsbezogen vs. institutioneller Missbrauch in der Kindheit) untersucht wird. Dabei werden vergangene Studien über Unterschiede der Prävalenz von PTBS und der diagnostischen Übereinstimmung nach ICD-10 (World Health Organization, 1992) und vorgeschlagener ICD-11 (Knefel & Lueger-Schuster, 2013; O'Donnell et al., 2014) repliziert und erweitert. Die Faktorenstruktur der ICD-11 PTBS wird bei älteren Personen erneut getestet (Forbes et al., 2015; Tay, Rees, Chen, Kareth, & Silove, 2015) und die latenten Symptomprofile der PTBS werden exploriert (Cloitre, Garvert, Brewin, Bryant, & Maercker, 2013).

### **Methoden**

#### **Teilnehmer**

In der vorliegenden Studie wurden die Stichproben aus drei verschiedenen Forschungsprojekten in einem Datensatz zusammengefasst ( $N = 399$ ). Für die Stichprobe von Überlebenden institutionellen Missbrauchs (IM) wurden die Daten von zwei Studien über IM miteinander kombiniert, wobei sich eine der Studien mit IM in Institutionen der katholischen Kirche in Österreich und die andere mit IM in Institutionen in Niederösterreich befasste ( $n = 83$ ) (Knefel & Lueger-Schuster, 2013; Lueger-Schuster et al., 2013.). Für die Stichprobe von Überlebenden mit kriegsbezogenen Kindheitstrauma wurden die Daten einer Studie über gegenwärtig ältere Überlebende des zweiten Weltkriegs (2.WK;  $n = 316$ ) herangezogen (Glück, Tran, & Lueger-Schuster, 2012). Für die vorliegende Studie wurden nur Betroffene in die Analyse inkludiert, die zum Zeitpunkt der Testung 60 Jahre oder älter waren. Alle Studien wurden gemäß der ethischen Verordnungen der klinischen Forschung in Österreich

durchgeführt. Die Ethikkommission der Universität Wien wies den Studien mit Überlebenden von IM Referenznummern zu (00011 und 00071).

Insgesamt nahmen 182 Männer (45.6%) und 217 Frauen (54.4%) an der Untersuchung teil. Die Studienstichprobe der 2.WK-Studie setzte sich überwiegend aus Frauen zusammen, die Studienstichprobe der IM-Studie setzte sich hingegen überwiegend aus Männern zusammen (weiblich: 62.3% vs. 24.1%; Pearson  $\chi^2(1) = 38.76, p < 0.001$ ). Das Alter der Untersuchten lag zwischen 60 und 99 Jahren ( $M = 78.6$  Jahre,  $SD = 9.2$ ); die Teilnehmer der 2.WK-Stichprobe waren älter als die Teilnehmer der IM-Stichprobe ( $M = 81.9$  Jahre,  $SD = 6.84$  vs.  $M = 66.01$ ,  $SD = 5.72$ ;  $t(397) = 19.44, p < 0.001$ ).

### Messungen

**Posttraumatische Belastungsstörung Checkliste – Zivilversion.** Die posttraumatische Belastungsstörung Checkliste - Zivilversion (engl. PCL-C) (Weathers, Litz, Herman, Huska, & Keane, 1991) erfasst Symptome der PTBS im letzten Monat gemäß den DSM-IV Kriterien, kann jedoch auch verwendet werden, um vorläufige Diagnosen der PTBS nach ICD-10 und ICD-11 abzuleiten. Die siebzehn Items der Skala erfassen fünf Symptome des Wiedererlebens (Kriterium B), sieben Vermeidungssymptome (Kriterium C) und fünf Hyperarousal (Kriterium D). Diese Symptome werden auf einer 5-stufigen Skala beurteilt, die von „gar nicht“ (1) bis „sehr“ (5) reicht und werden dann als symptomatisch angesehen, wenn die Alternativen drei oder darüber angegeben werden. Für die vorliegende Studie wurden ausschließlich die Items 1-8 und 13-17 verwendet, da diese jene Symptome erfragen, die in der ICD-10 Diagnose der PTBS aufgelistet sind. Für die ICD-11 PTBS wurden die Items 2 und 3, 6 und 7 und 16 und 17 verwendet (Siehe Abbildung 1 für Iteminhalte). In der vorliegenden Stichprobe ergaben die Algorithmen für die ICD-10 PTBS Cronbach's  $\alpha = 0.89$  und für die ICD-11 PTBS Cronbach's  $\alpha = 0.81$ .

**Brief Symptom Inventory - BSI.** Das Brief Symptom Inventory (BSI) ist ein Messinstrument, das anhand von 53 Items die gegenwärtigen somatischen und

## PTBS: ICD-10 VS ICD-11 BEI ÄLTEREN PERSONEN

psychologischen Symptome und die allgemeine Belastung erfasst (Franke & Derogatis, 2000). Personen beurteilen dabei unterschiedliche Symptome, die sie über die letzten 7 Tage erlebt haben, auf einer 5-stufigen Rating-Skala (0 = *überhaupt nicht* bis 4 = *extrem*). Es können neun Subskalen und ein globaler Gewichtungssindex berechnet werden. Den Cut-Off-Wert für klinisch relevante Symptome stellt ein T-Wert von 63 dar. Für die vorliegende Studie wurden lediglich die Dimensionen Depression, Angst und Somatisierung berücksichtigt. Die psychometrischen Eigenschaften sind sehr gut (Cronbach's  $\alpha = 0.96$ ).

Abbildung 1. Ausmaß bedingter Symptomschwere pro Cluster. Symptome in Boxen sind Symptome der

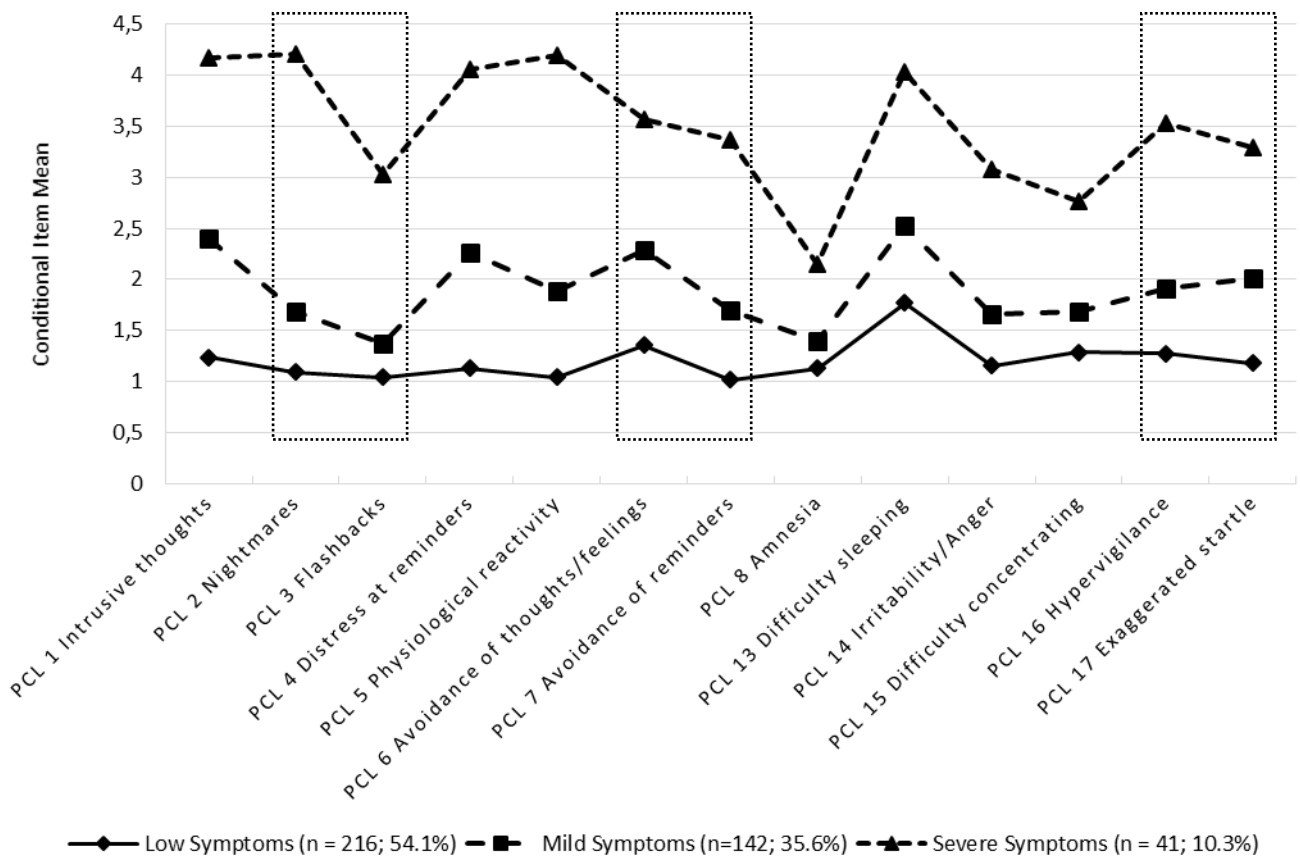

vorgestellten ICD-11 PTBS. PCL = Posttraumatic Stress Disorder Checklist – Civilian Version.

### Datenanalyse

Zuerst wurden in beiden Stichproben die Anteile der Personen errechnet, die gemäß der ICD-10 und der vorgeschlagenen ICD-11 die Kriterien für die Diagnose einer PTBS erfüllten. Ebenso wurden die Prävalenzen für alle drei Kriterien für beide diagnostischen Systeme

errechnet. Um die Prävalenzen miteinander zu vergleichen wurden zweiseitige binomial approximierte z-Tests verwendet und mittels Cohen's Kappa wurde die diagnostische Übereinstimmung evaluiert. Darüber hinaus wurden die Verhältnisse für klinisch relevante komorbide depressive, Angst- und somatische Beschwerden für alle PTBS Gruppen errechnet. Anschließend wurden drei Faktorenmodelle der ICD-11 PTBS-Struktur (ein-, zwei- und dreifaktoriell) auf ihre Anpassungsgüte hin untersucht. Das einfaktorielle Modell stellte dabei ein Generalfaktormodell dar, bei dem alle Items, die die sechs Symptome der ICD-11 PTBS bemessen, so spezifiziert wurden, dass sie auf einen einzigen Faktor laden. In dem zweifaktoriellen Modell wurden die Items, die die Symptome „Wiedererleben“ und „Vermeidung“ messen, spezifiziert auf einen Faktor zu laden und die Items, die die Symptome der „Hyperarousal“ messen, spezifiziert auf einen anderen Faktor zu laden (Forbes et al., 2015). Schließlich wurde die vorgeschlagene Faktorenstruktur der PTBS in ICD-11 anhand eines dreifaktoriellen Modells untersucht, wobei die Symptome des „Wiedererlebens“, der „Vermeidung“ und des „Hyperarousals“ jeweils einen Faktor darstellten. In dem zwei- und dreifaktoriellen Modell durften die latenten Faktoren frei miteinander korrelieren.

Alle konfirmatorischen Faktorenanalysen (KFA) wurden mit Mplus (Muthén & Muthén, 2010) durchgeführt. Da die Symptome als gereichte kategoriale Variablen erhoben wurden, wurden die Parameter mithilfe des weighted least square mean- and variance-adjusted estimator (WLSMV) geschätzt, um robuste Parameterschätzungen, Standardfehler und Tests auf Modellpassung zu gewährleisten (Beauducel & Herzberg, 2006). Der Comparative Fit Index (CFI), der Tucker-Lewis Index (TLI) und der root mean square error of approximation (RMSEA) wurden verwendet, um die Modellpassung zu beurteilen (CFI und TLI: Gute Passung  $\geq 0.95$ , annehmbare Passung  $\geq 0.90$ ; und RMSEA: Gute Passung  $< 0.06$ , annehmbare Passung  $< 0.08$ ) (Hu & Bentler, 1999). Um die Passung der verschiedenen Modelle mit dem Bayes-Informationskriterium (BIC) zu vergleichen, wurde die Analyse mithilfe einer robusten maximum likelihood estimation (MLR) wiederholt.

Des Weiteren wurde die optimale Anzahl an latenten Klassen in der vorliegenden Stichprobe anhand der 13 ICD-10 PTBS Symptome bestimmt. Dabei wurde die LPA angewandt, die auf einem latenten Variablenmodell basiert und zum Ziel hat, homogene Gruppen von Personen in einer vorliegenden Stichprobe auszumachen. Es wurde die Modellpassung einer Ein-, Zwei-, Drei- und Vierklassenlösung mithilfe des BIC (basierend auf dem Log-Likelihood-Wert), der Likelihood-Ratio-Teststatistik ( $L^2$ ) und des Prozentsatzes des Klassifikationsfehlers evaluiert. Die LPA wurde mit Latent GOLD durchgeführt (Vermunt & Magidson, 2005). Um einen möglichen Zusammenhang zwischen Alter, Geschlecht und der Stichprobe zu erörtern, wurde ein multinomiales Regressionsmodell für die Vorhersage der Klassenzugehörigkeit angewandt.

Zuletzt wurden die Resultate der diagnostischen Algorithmen mit den Resultaten der KFAs und der LPA mithilfe von Kreuztabellen zusammengeführt, um auf diese Weise festzustellen, in welchem Ausmaß diese konfirmatorischen und explorativen Ansätze mit dem diagnostischen Algorithmus der vorgeschlagenen ICD-11 übereinstimmen.

### **Resultate**

Die Prävalenz der PTBS nach ICD-10 war in der Gesamtstichprobe signifikant höher als die Prävalenz der PTBS nach vorgeschlagener ICD-11 (Pearson  $\chi^2(1) = 189.38, p < 0.001$ ; Tabelle 1); die diagnostische Übereinstimmung betrug 92.7% ( $\kappa = 0.67$ , 95% KI von 0.56 bis 0.78); signifikant weniger Personen erfüllten das Kriterium des Wiedererlebens nach ICD-11 als nach ICD-10. Die Vermeidungssymptome unterschieden sich zwischen ICD-10 und dem vorgeschlagenen ICD-11 nicht, folglich bestand in dieser Hinsicht eine perfekte Übereinstimmung. Während ein ähnlicher Prozentsatz der Betroffenen das Kriterium des Hyperarousals erfüllte, zeigten genauere Analysen, dass ungefähr ein Viertel der Personen, die das ICD-10 Kriterium erfüllten, das ICD-11 Kriterium nicht erfüllten. Folglich erfüllte ein



weiteres Viertel der Personen, die das ICD-11 Kriterium des Hyperarousals erfüllten, dieses Kriterium nicht in ICD-10.

Die Prävalenz von PTBS variierte über die Stichproben hinweg; Überlebende von IM wiesen signifikant höhere Raten von PTBS im Vergleich zu Überlebenden des 2.WK nach ICD-10 (49.4% vs. 6.0%; Pearson  $\chi^2(1) = 96.84, p < 0.001$ ) und der vorgeschlagenen ICD-11 (39.8% vs. 2.5%; Pearson  $\chi^2(1) = 98.81, p < 0.001$ ) auf.

Die Komorbiditätsraten (klinisch relevante Symptome in den Bereichen Depression, Angst und Somatisierung) waren für PTBS nach der vorgeschlagenen ICD-11 durchwegs höher als nach der ICD-10, wenn auch nicht signifikant (Tabelle 1).

Alle drei spezifizierten Faktorenmodelle wiesen eine hohe Anpassungsgüte an die Daten auf (Tabelle 2). Die Passung des einfaktoriellen Modells wurde in den größeren Faktorenmodellen nicht wesentlich verbessert. Die über MLR Schätzungen errechneten BICs zeigten eine überlegene Passung des einfaktoriellen Modells im Gegensatz zu den anderen beiden Modellen. Auf diese Weise konnte mithilfe der vorliegenden Daten das von Forbes et al. (2015) postulierte zweifaktorielle Modell nicht bestätigt werden. Aus diesem Grund und aus Gründen der Sparsamkeit wurde die Analysestrategie adaptiert und das postulierte zweifaktorielle Strukturmodell der ICD-11 PTBS in die weiteren Analysen nicht mit aufgenommen. Um die Möglichkeit von Gruppeneffekten auszuschließen, wurden die KFAs in beiden Stichproben (2.WK vs. IM) wiederholt. Bei unabhängiger Analyse beider Stichproben zeigte das einfaktorielle Modell wiederum jeweils eine überlegene Passung.

In einem dritten Schritt wurde mittels LPA versucht, latente Gruppen von Individuen mit spezifischen Symptomprofilen zu identifizieren. Dafür wurde ein Ein-, Zwei-, Drei- und Vierklassenmodell geschätzt (Tabelle 2). Ebenso wurde ein Dreiklassenmodell geschätzt, das korrelierte Residuen für die Items 14 und 17 (siehe Abbildung 1 für Iteminhalte) zuließ. Das Vierklassenmodell wies den niedrigsten BIC-Wert auf. Dagegen war der Klassifikationsfehler im Dreiklassenmodell mit korrelierten Residuen deutlich kleiner und die zusätzliche vierte

## PTBS: ICD-10 VS ICD-11 BEI ÄLTEREN PERSONEN

Klasse lieferte keine weiteren Informationen. Aus diesem Grund wurde das

Dreiklassenmodell mit korrelierten Residuen gewählt. Es bestanden hohe durchschnittliche A-Posteriori-Wahrscheinlichkeiten für alle drei Klassen, was auf eine hohen

Klassifikationssicherheit hinweist (Klasse 1: 92.5%; Klasse 2: 93.0%; Klasse 3: 96.2%).

Tabelle 1. Prävalenz und Übereinstimmung der PTBS Kriterien nach ICD-10 und vorgeschlagenem ICD-11, Komorbidität und Übereinstimmung der Klassen mit dem diagnostischen Status.

| Variable                            | ICD-10<br>PTSD |      | ICD-11<br>PTSD |      | $z$   |  | $p$    | $\kappa$ | ICD-11 from ICD-10 |      |           |      |               |      |
|-------------------------------------|----------------|------|----------------|------|-------|--|--------|----------|--------------------|------|-----------|------|---------------|------|
|                                     |                |      |                |      |       |  |        |          | Absent             |      | Unchanged |      | Newly present |      |
|                                     | n              | %    | n              | %    |       |  |        |          | n                  | %    | n         | %    | n             | %    |
| Full PTSD                           | 60             | 15.0 | 41             | 10.3 | 2.02  |  | .043   | .67      | 24                 | 6.0  | 370       | 92.7 | 5             | 1.3  |
| Re-experience criterion             | 168            | 42.1 | 82             | 20.6 | 6.56  |  | < .001 | .53      | 86                 | 21.6 | 313       | 78.4 | 0             | 0.0  |
| Avoidance criterion                 | 125            | 31.3 | 125            | 31.3 | -     |  | -      | 1.0      | -                  | -    | -         | -    | -             | -    |
| Hyperarousal criterion <sup>a</sup> | 121            | 30.3 | 122            | 30.6 | -0.08 |  | .936   | .64      | 30                 | 7.5  | 338       | 84.7 | 31            | 7.8  |
| BSI GSI T $\geq 63^b$               | 41             | 70.7 | 32             | 78.0 | -0.82 |  | .412   |          | 10                 | 45.5 | 68        | 19.0 | 1             | 20.0 |
| Depression                          | 31             | 51.7 | 25             | 61.0 | -0.92 |  | .358   |          | 8                  | 33.3 | 56        | 15.1 | 2             | 40.0 |
| Anxiety                             | 36             | 60.0 | 32             | 78.0 | -1.90 |  | .057   |          | 6                  | 25.0 | 62        | 16.8 | 2             | 40.0 |
| Somatization                        | 42             | 70.0 | 32             | 78.0 | -0.90 |  | .368   |          | 12                 | 50.0 | 122       | 33.0 | 2             | 40.0 |
| Class                               |                |      |                |      |       |  |        |          |                    |      |           |      |               |      |
| Low Symptoms                        | 0              | 0.0  | 0              | 0.0  | -     |  | -      |          | 0                  | 0.0  | 216       | 58.4 | 0             | 0.0  |
| Mild Symptoms                       | 26             | 43.3 | 7              | 17.1 | 2.76  |  | .006   |          | 21                 | 87.5 | 119       | 32.2 | 2             | 40.0 |
| Severe Symptoms                     | 34             | 56.7 | 34             | 82.9 | -2.76 |  | .006   |          | 3                  | 12.5 | 35        | 9.5  | 3             | 60.0 |

ICD-10 = International Classification of Diseases - 10<sup>th</sup> revision; ICD-11 = International Classification of Diseases - 11<sup>th</sup> revision; PTSD = posttraumatic stress disorder; BSI GSI = Brief Symptom Inventory: Global Severity Index.

<sup>a</sup> Vermeidungssymptome ändern sich zwischen ICD-10 und vorgeschlagenem ICD-11 nicht, weshalb dieselben Personen diese Kriterien in beiden Systemen erfüllen.

<sup>b</sup> n=384, bei 15 Teilnehmern waren nicht alle Angaben vorhanden.

Basierend auf den Profilen der Symptomschwere der drei Klassen wurde jeder Klasse eine deskriptive Bezeichnung zugeordnet. Klasse 1 wurde als „Geringe Symptome“, Klasse 2 als „Mittelgradige Symptome“ und Klasse 3 als „Schwerwiegende Symptome“ bezeichnet.

Der durchschnittliche Grad der Symptomschwere für jede Klasse befindet sich in Abbildung

1. Eine multinomiale Regressionsanalyse, über die die Klassenzugehörigkeit mittels

Geschlecht, Alter und Untersuchungsgruppe (Tabelle 3) vorhergesagt wurde, wies eine signifikante Anpassungsgüte auf ( $\chi^2(6) = 175.54, p < 0.001$ ) und erklärte 42.1% der Varianz (Nagelkerke  $R^2 = 0.421$ ). Das weibliche Geschlecht wurde dabei eher mit der Klasse der geringen als mit der Klasse der mittelgradigen Symptome assoziiert. Überlebende von IM befanden sich in allen Kombinationen wahrscheinlicher in der Klasse der schwerwiegenden Symptome als Überlebende des 2.WK.

Tabelle 2. Fit Indices für ICD-11 PTBS Faktorenmodelle und Anpassungsgüte der latenten Klassenmodelle für ICD-10 PTBS Symptome.

| CFA | Model                                          | $\chi^2$ (df) | CFI     | TLI  | RMSEA [95%-CI]   | BIC <sup>a</sup>        |
|-----|------------------------------------------------|---------------|---------|------|------------------|-------------------------|
|     | 1-factor                                       | 18.678 (9)*   | .991    | .985 | .052 [.016,.086] | 6671.309                |
|     | 2-factor                                       | 16.135 (8)*   | .992    | .986 | .051 [.010,.087] | 6673.889                |
|     | 3-factor                                       | 6.875 (6)     | .999    | .998 | .019 [.000,.070] | 6677.937                |
| LPA | Model                                          | BIC           | $L^2$   | df   | p                | Classification error, % |
|     | 1-class                                        | 11111.58      | 6600.16 | 52   | <.001            | 0.00                    |
|     | 2-class                                        | 10089.06      | 5493.79 | 66   | <.001            | 2.59                    |
|     | 3-class                                        | 9882.44       | 5203.33 | 80   | <.001            | 6.92                    |
|     | 3-class with correlated residuals <sup>b</sup> | 9867.85       | 5182.75 | 81   | <.001            | 6.98                    |
|     | 4-class                                        | 9856.32       | 5093.36 | 94   | <.001            | 10.05                   |

CFA = confirmatory factor analysis, using WLSMV estimation; CFI = comparative fit index; TLI = Tucker-Lewis index; RMSEA = root mean square error of approximation; 95%-CI = 95% confidence interval; BIC = Bayes information criterion; LPA = latent profile analysis;  $L^2$  = likelihood ratio test statistic.

<sup>a</sup> basierend auf einer robusten ML Schätzung.

<sup>b</sup> Das Modell erlaubte korrelierte Residuen für die Items 14 (Irritierbarkeit/Ärger) und 17 (Übertriebene Schreckreaktion).

\*  $p < .05$ .

Zuletzt wurden die Resultate der LPA mit den diagnostischen Algorithmen zusammengeführt (Tabelle 1). Keine der Personen, die die Kriterien einer PTBS nach ICD-10 oder ICD-11 erfüllten, wurde der Klasse der geringen Symptome zugewiesen. Ein signifikant höherer Anteil der Personen mit ICD-10 PTBS wurde der mittelgradigen Symptomklasse

zugeordnet, wohingegen ein signifikant höherer Anteil an Personen mit ICD-11 PTBS der schwerwiegenden Symptomklasse zugeordnet wurde.

Tabelle 3. Verwendung eines multinomialen Regressionsmodells um die Klassenzugehörigkeit unter Verwendung von Geschlecht, Alter und Studiengruppe vorherzusagen.

|                           | Mild- vs. Low Symptoms | Severe- vs. Low Symptoms | Severe- vs. Mild Symptoms |
|---------------------------|------------------------|--------------------------|---------------------------|
| Age                       | 1.01 [0.98–1.04]       | 0.95 [0.88–1.02]         | 0.94 [0.87–1.01]          |
| Gender (female vs.male)   | 1.70 [1.04–2.76]*      | 1.25 [0.44–3.57]         | 0.74 [0.28–1.96]          |
| Study-group (IA vs. WWII) | 15.38 [5.59–41.67]***  | 250.00 [38.46– >200]***  | 18.52 [2.98–111.11]**     |

Numbers are odds ratios (ORs) with 95% confidence intervals.

\*  $p < .05$ , \*\*  $p < .01$ , \*\*\*  $p < .001$ .

## Diskussion

### Hauptergebnisse

In der vorliegenden Studie wurden drei verschiedene Perspektiven in Bezug auf die Klassifikation der PTBS nach ICD untersucht: Erstens wurde ein signifikanter Rückgang der Prävalenz der PTBS von ICD-10 zu ICD-11 festgestellt, wobei die Veränderung weitgehend durch den Rückgang im Kriterium des Wiedererlebens erklärt wird. Zweitens wies das einfaktorielle Modell der PTBS, im Vergleich zu vormals vorgeschlagenen zwei- oder dreifaktoriellen Modellen, in dieser Stichprobe eine höhere Anpassungsgüte auf, wobei anzumerken ist, dass auch die zwei- und dreifaktoriellen Modelle eine hohe Passung an die Daten aufwiesen. Drittens ergaben sich im Laufe der Analyse der Symptomprofile in der Gesamtstichprobe drei latente Gruppen von Personen hinsichtlich des Schweregrads. Die Zugehörigkeit zu einer Gruppe an Schweregraden erwies sich dabei als guter Prädiktor für die Diagnose der PTBS und die Art der Traumatisierung.

### **PTBS nach ICD-10 und ICD-11**

Im Vergleich erfüllten signifikant weniger Personen die Kriterien für eine PTBS Diagnose nach ICD-11 als nach ICD-10. In Übereinstimmung mit den angeführten Resultaten wurden auch in anderen Studien in verschiedenen Stichproben höhere Prävalenzraten der PTBS nach ICD-10 als nach ICD-11 gefunden (9.0% vs. 3.3% bei erwachsenen Patienten mit Verletzungen, O'Donnell et al., 2014; 13.0% vs. 6.0% in West-Neuguineanischen Flüchtlingen, Tay et al., 2015; und 4.4% vs. 3.2% in der Allgemeinbevölkerung, Stein et al., 2014). Der Rückgang der Prävalenz in der vorliegenden Studie ist hauptsächlich auf die engere Definition des Kriteriums des Wiedererlebens in ICD-11 zurückzuführen: Während nach ICD-10 noch 42.1% dieses Kriterium erfüllten, waren es nach ICD-11 nur mehr 20.6%. Dabei setzten sich Personen, die das Kriterium des Wiedererlebens nach ICD-11 erfüllten, als vollständige Untergruppe aus den Personen zusammen, die dieses Kriterium nach ICD-10 erfüllten. Diese Ergebnisse decken sich mit früherer Forschung (O'Donnell et al., 2014; Tay et al., 2015), wobei diese Muster weder spezifisch für Trauma- noch für Kulturart zu sein scheinen. In ICD-11 wird vorgeschlagen, die Kriterien der Diagnose auf die für die PTBS spezifischen Kernelemente zu beschränken (Maercker et al., 2013). Dies hat zur Folge, dass das Kriterium des Wiedererlebens nur mehr das Wiedererleben des Traumas in Form von Alpträumen und Flashbacks, die mit Empfindungen von Angst und Schrecken einhergehen (Brewin, 2013), beinhaltet. Es ist dabei fragwürdig ob dieser Ansatz valide ist, da 21.5% der untersuchten Stichprobe an klinisch relevanten intrusiven Symptomen litten, jedoch das Kriterium des Wiedererlebens nach ICD-11 nicht erfüllten. Der Ausschluss von anderen Symptomen wie etwa intrusiven Bildern ohne dissoziativen Charakter, die mit dem erneuten Erleben in Verbindung stehen, könnte möglicherweise dazu führen, dass die Phänomenologie und die Bedürfnisse der Personen, die an den Folgen von traumatischen Erlebnissen leiden (Bisson, 2013), nicht angemessen erfasst werden. Die im DSM-5 ausgewiesene Definition des Wiedererlebens bei PTBS (American Psychiatric Association, 2013) folgte diesem Ansatz

nicht (Friedman, 2013) und verblieb somit ähnlich wie in DSM-IV und ICD-10. Um im DSM-5 das Kriterium des Wiedererlebens zu erfüllen, wird das Vorhandensein von einem von fünf Symptomen verlangt, die verschiedene Formen des Wiedererlebens abdecken, wobei der Fokus dabei nicht auf Prozesse des Grübelns, sondern stattdessen auf intrusive Eigenschaften gelegt wird. Folglich müssen Personen, die an Wiedererlebenssymptomen leiden, die nicht als Kernsymptome der PTBS nach ICD-11 festgelegt sind, hinsichtlich Komorbidität, Behandlungsbedürfnissen und Behandlungsempfänglichkeit untersucht werden.

Das Kriterium des Hyperarousals unterscheidet sich zwischen ICD-10 und ICD-11 ebenfalls, wobei in der vorliegenden Untersuchung teilweise überlappende Subgruppen gefunden wurden. Die Arbeitsgruppe der ICD-11 zielte darauf ab, den Fokus auf traumaspezifische Arten des Hyperarousals zu legen (z.B. Hypervigilanz und übertriebene Schreckreaktionen) und exkludierte unspezifischere Arten von Hyperarousal (z.B. Schlaf- oder Konzentrationsschwierigkeiten) (Maercker et al., 2013). Beispielsweise weisen Schlafschwierigkeiten eine hohe Prävalenz in der Allgemeinbevölkerung auf und nehmen mit steigendem Alter zu (Ohayon, Carskadon, Guilleminault, & Vitiello, 2004). In Stichproben mit älteren Personen könnte dies mit hoher Wahrscheinlichkeit zu einer Verzerrung der PTBS Prävalenzraten führen.

### **Faktorenstruktur der PTBS nach ICD-11**

Alle Faktorenmodelle, die anhand der vorliegenden Stichprobe getestet wurden, wiesen eine hohe Anpassungsgüte auf. Das einfaktorielle Modell war sowohl dem von Forbes et al. (2015) vorgeschlagenem zweifaktoriellen Modell als auch dem von der ICD-11 Arbeitsgruppe vorgeschlagenem dreifaktoriellen Modell (Maercker et al., 2013) überlegen. Eine einfaktorielle Lösung erscheint unüblich für die PTBS, ungeachtet dessen, welches der Klassifikationssysteme - ICD (Forbes et al., 2015) oder DSM (Yufik & Simms, 2010) – Anwendung findet. Verschiedene Ursachen könnten die Unterschiede in den Ergebnissen der vorliegenden Studie und der Studie von Forbes et al. (2015) erklären: (1) Die Erfassung der

relevanten Symptome differierte zwischen den Studien. Während in der vorliegenden Studie die PTBS durch Selbsteinschätzung mit einem Item pro Symptom gemessen wurde, fand bei Forbes et al. das CAPS Interview (Blake et al., 1995) Anwendung, welches zwei Items (Frequenz und Intensität) pro Symptom beinhaltet. (2) Die Ergebnisse könnten in Abhängigkeit von der Art der Traumatisierung und dem Alter, in dem sie stattfand, variieren. In der vorliegenden Studie wurden ältere Personen mit teilweise schwerwiegenden und lang anhaltenden traumatischen Kindheitserfahrungen untersucht. Forbes et al. untersuchten die Symptome von PTBS bei Überlebenden von Verletzungen, die ein Durchschnittsalter von 40 Jahren aufwiesen. Die Erscheinung der Symptome nach einem anhaltenden Trauma in der Kindheit könnte sich von der Erscheinung der Symptome bei traumatischen Verletzungen im Erwachsenenalter unterscheiden, was wiederum Einfluss auf die Faktorenstruktur nehmen könnte (Yufik & Simms, 2010). (3) Die zwischen der Traumatisierung und dem Erhebungszeitpunkt liegende Zeitspanne könnte einen weiteren Einflussfaktor darstellen (Yufik & Simms, 2010). Während in der vorliegenden Studie die Teilnehmer mit traumatischen Erlebnissen konfrontiert wurden, die vor Jahrzehnten stattgefunden hatten, untersuchten Forbes et al. Daten einer 6-Jahres-Follow-up-Studie. (4) Das Alter bei der Beurteilung könnte die Symptommerscheinung ebenfalls beeinflussen. Diese Aspekte benötigen weitere Untersuchungen, in denen die Invarianz des Faktorenmodells der PTBS nach ICD-11 über verschiedene Alters- und Personengruppen mit verschiedenen Arten von Traumatisierungen untersucht werden.

### **Symptomgewichtung, Komorbidität und Art des Traumas**

Keine Person, bei der eine PTBS diagnostiziert wurde (ICD-10 oder ICD-11), wurde der Klasse der geringen Symptome zugeordnet. Die PTBS Diagnose wurde mit unterschiedlicher Klassenzugehörigkeit für ICD-10 und ICD-11 assoziiert: Personen, die die Kriterien einer PTBS nach ICD-10 erfüllten, wiesen beinahe dieselbe Wahrscheinlichkeit auf, der mittelgradigen und schwerwiegenden Symptomklasse zugeordnet zu werden. Im Gegensatz

## PTBS: ICD-10 VS ICD-11 BEI ÄLTEREN PERSONEN

dazu wurden Personen, die die Kriterien einer PTBS nach ICD-11 erfüllten, wahrscheinlicher der schwerwiegenden Symptomklasse zugeordnet. In dieser Stichprobe scheint ICD-11 also spezifischer für Personen mit schwerwiegenden Symptomen der PTBS zu sein und exkludiert Personen mit mittelgradigen Symptomen. So besteht folglich die Möglichkeit, dass Personen, die an weniger als schwerwiegender traumabezogener Belastung leiden, die Kriterien der PTBS nach ICD-11 nicht erfüllen.

In dieser Studie wurde kein Rückgang der Komorbiditäten in der Stichprobe zwischen ICD-10 und ICD-11 gefunden. Dies war unerwartet, da im ICD-11 der Fokus auf die Kernelemente der PTBS mit dem Ziel gelegt wurde, die Komorbidität mit anderen psychischen Störungen zu verringern, was einen der Hauptkritikpunkte des ICD-10 darstellte (Maercker et al., 2013). In der vorliegenden Studie exkludierte ICD-11 Personen mit mittelgradigen PTBS Symptomen von einer PTBS Diagnose, was in ICD-10 nicht der Fall war. Die Personen mit den schwerwiegendsten Symptomen waren auch die Personen, die die höchste Komorbidität in ICD-10 aufwiesen. Folglich diagnostizierte ICD-11 spezifisch Personen mit PTBS, die schwerwiegende Symptome und hohen Komorbiditätsraten aufwiesen (Tabelle 1).

Die Art der Traumatisierung, welche in der vorliegenden Studie weitgehend äquivalent zur Studiengruppe war (IM vs. 2.WK), stellte den stärksten Prädiktor für die Klasse des Symptomschweregrads und der PTBS dar. Die Klasse der schwerwiegenden Symptome beinhaltete vorrangig Überlebende von institutionellem Missbrauchs, wobei das Erleben komplexer Kindheitstraumata einen Hauptrisikofaktor für PTBS darstellt (Briere, Kaltman, & Green, 2008; Cloitre et al., 2009). Obwohl kriegsbezogene Erfahrungen, vor allem wenn sie im jüngeren Alter erlitten wurden (Bramsen & Van der Ploeg, 1999), als ähnlich komplex und nachteilig angesehen werden, scheinen die langandauernden Effekte dieser Erfahrungen auf die gegenwärtige psychische Gesundheit in der untersuchten Stichprobe entweder im Zuge der Lebensspanne abgeklungen, durch unbekannte Faktoren gepuffert oder im Vergleich zu



den Effekten von IM nicht gleichermaßen gravierend zu sein (Böttche, Kuwert, & Knaevelsrud, 2012). Des Weiteren wurde ein partieller Geschlechtereffekt beobachtet: Frauen befanden sich wahrscheinlicher in der mittelgradigen als in der geringen Symptomklasse, wohingegen kein Geschlechtseffekt für die Klasse schwerwiegender Symptome beobachtet werden konnten. Dies könnte aus der Zuteilung der Studiengruppen zu den Klassen der Schweregrade resultieren. Zukünftige Forschung muss die Faktoren näher untersuchen, die hauptverantwortlich für die hohe Symptombelastung bei diesen Arten von Traumatisierung sind und erforschen, ob ein kritischer Grenzwert existiert, der eine Remission im Zuge der Lebensspanne unwahrscheinlich macht.

### **PTBS im höheren Alter**

Wie bereits angeführt, wurden Kindheitstraumata mit stärkerer Beeinträchtigung im höheren Alter assoziiert, als traumatische Erlebnisse, die in anderen Entwicklungsstufen wie etwa dem Erwachsenenalter (Ogle et al., 2013) stattfanden. Allerdings wurde ebenso festgestellt, dass ältere Menschen, die über Traumatisierungen in früheren Jahren berichteten, einen Rückgang des Schweregrads der PTBS Symptome über die Lebensspanne aufwiesen (Böttche et al., 2012) und sich die Symptomkonfiguration bei älteren Personen allgemein unterscheiden kann (Averill & Beck, 2000). In Anbetracht der Möglichkeit, dass sich Symptome über die Lebensspanne verändern, könnten sich posttraumatische Symptome also auch von „typischen“ PTBS Symptomen zu somatoformen Störungen, anderen traumabezogenen psychischen Problemen (Freitag, Braehler, Schmidt, & Glaesmer, 2013; Noll-Hussong et al., 2012) oder anderen somatischen Gesundheitsproblemen entwickeln, die im höheren Alter vermehrt auftreten (Glaesmer, Brähler, Gundel, & Riedel-Heller, 2011; Pietrzak, Goldstein, Southwick, & Grant, 2012). Aus diesem Grund scheint eine differenziertere Analyse der Symptomprofile informativer zu sein als eine Untersuchung der allgemeinen Symptomschwere (Yehuda et al., 2009).

Hinsichtlich dieser Aspekte konnte in der vorliegenden Studie festgestellt werden, dass Personen mit schwerwiegenderen Symptomen nicht nur wahrscheinlicher mit PTBS diagnostiziert wurden, sondern auch die höchste Anzahl an komorbiden psychischen Gesundheitsproblemen wie etwa depressiven Symptomen, Somatisierungs- oder Angstsymptomen aufwiesen. Dies traf vor allem bei komplexen und schwerwiegenden Kindheitstraumatisierungen wie im Falle von IM zu. Alle diese Probleme vermehren die allgemeine Symptombelastung, die die momentane Gesundheit der Überlebenden beeinflusst, noch weiter. Indessen war es nicht möglich, anhand der in dieser Studie verwendeten Daten zu untersuchen, ob in der vorliegenden Stichprobe etwa Besonderheiten in der Symptomkonfiguration im Vergleich zu anderen Altersgruppen vorherrschten. Im Allgemeinen ist festzuhalten, dass die den Verlauf und die Schwere der Symptome von PTBS über die Lebensspanne betreffenden Ergebnisse noch immer uneindeutig sind, wobei diese Uneindeutigkeit die Angemessenheit der momentanen Klassifikation von PTBS in Frage stellt, um Symptomstrukturen im höheren Alter adäquat zu beschreiben (cf. Böttche et al., 2012). Diese Belange sind in zukünftigen Studien, in denen posttraumatische Reaktionen in verschiedenen Altersgruppen der Stichprobenpopulation untersucht werden sollten, zu erörtern. Die Stichprobenpopulation stellt dabei die Personen dar, die vergleichbare traumatische Erfahrungen erlitten haben.

### **Limitationen**

Die Generalisierbarkeit der vorliegenden Resultate ist hinsichtlich folgender Aspekte limitiert: (1) Die Daten der Untersuchung wurden von verschiedenen Studien gewonnen, wobei in diesen verschiedene und spezifische Typen von Kindheitstraumata (2.WK-bezogen und IM) und gegenwärtige posttraumatische Symptome mittels Querschnittsdesigns erfasst wurden. Obwohl es eine der Stärken und das Ziel der vorliegenden Studie war, verschiedene Arten von Traumatisierungen in verschiedenen Stichproben miteinander zu vergleichen, kann dennoch nicht ausgeschlossen werden, dass die vorliegenden Resultate durch nicht

kontrollierbare Variablen konfundiert wurden. (2) Anstelle von strukturierten klinischen Interviews wurden Selbstbeurteilungsfragebögen eingesetzt. Diese Fragebögen wurden ursprünglich zur Erfassung von DSM-IV PTBS Symptomen entworfen, fanden jedoch Anwendung, da zum vorherrschenden Zeitpunkt noch kein valides Messinstrument zur Diagnose der ICD-11 PTBS Symptome vorlag. Des Weiteren ist für eine PTBS Diagnose nach ICD-11 eine funktionale Beeinträchtigung notwendig, welche in der vorliegenden Studie nicht erhoben wurde. (3) Die Berichterstattung über traumatische Erlebnisse könnte durch Erinnerungsschwierigkeiten bei älteren Personen verzerrt worden sein. Zukünftige Untersuchungen der Struktur und Symptomkonfiguration der PTBS nach ICD-11 sollten in großen Stichproben verschiedene Arten von Traumatisierungen erfassen, um auf diese Weise eine potentielle Verzerrung der Gesamtprävalenz zu berücksichtigen. Sobald eine finale Übereinstimmung die diagnostischen Kernelemente der ICD-11 betreffend existiert, werden darüber hinaus Studien benötigt, die die vorliegenden Befunde mithilfe von, für die ICD-11 entworfenen, validen Messinstrumenten replizieren.

### **Implikationen**

Die vorliegende Studie befasst sich mit wichtigen Belangen, die die diagnostische und klinische Nützlichkeit der vorgeschlagenen ICD-11 PTBS Symptome des im Jahr 2017 erscheinenden ICD-11 betreffen. In Übereinstimmung mit den Erwartungen wurde mit dem vorgeschlagenen ICD-11 ein signifikanter Rückgang der Prävalenz der PTBS beobachtet, da es dem Vorhaben entsprach, nur Kernsymptome der PTBS zu erfassen und den Inflationsbias durch komorbide Symptome, die durch andere psychische Störungen besser erklärt werden können, zu verringern. Dennoch konnte im Vergleich zwischen ICD-10 und ICD-11 kein spezifisches Profil von traumabezogenen Symptomen, sondern stattdessen Klassen von verschiedenen Ausprägungsgraden ausgemacht werden. Die PTBS des ICD-11 scheint dabei viel spezifischer für Betroffene mit schwerwiegenden Traumasymptomen zu sein. Die Häufigkeit an Komorbiditäten unterschied sich in der vorliegenden Stichprobe zwischen ICD-

10 und ICD-11 nicht, wodurch sich die Zielerreichung des ICD-11, die Komorbidität der PTBS mit anderen psychischen Störungen zu verringern, nicht bestätigen ließ. In der vorliegenden Studie erwies sich ein einfaktorielles Modell der PTBS als das Modell mit der höchsten Anpassungsgüte, was im Gegensatz zu früherer Forschung steht (Forbes et al., 2015; Yufik & Simms, 2010). Dieses Ergebnis stellt die vorgeschlagene Faktorenstruktur zumindest für ältere Personen mit einer Vorgeschichte komplexer Traumatisierungen in Frage. Mit der Änderung der PTBS Kriterien in Klassifikationssystemen könnten Betroffene, die an weniger schwerwiegenden Symptomen leiden, den Zugang zu psychischen Gesundheitsdiensten einbüßen. Um die vorgeschlagenen Kriterien der PTBS nach ICD-11 zu stützen und zu kräftigen, werden weitere Untersuchungen zu den zentralen Themen Symptomkonfiguration, Komorbidität, Faktorenstruktur und Traumaspezifität benötigt.

### **Autorenbeitrag**

TMG und MK trugen zu dieser Arbeit in gleichem Maße bei und teilen die erste Autorenschaft. TMG und MK planten die vorliegende Studie und entwarfen und verfassten das Manuskript. TMG, MK und UST entwarfen und führten die statistischen Analysen durch. UST und BLS trugen zum Verfassen des Manuskripts bei. BLS plante und betreute die Forschungsprojekte, aus denen die in dieser Studie analysierten Daten stammen.

### **Interessenskonflikt und Finanzierung**

Die Forschungsprojekte wurden durch den Zukunftsfond Österreichs finanziert (Studie über den zweiten Weltkrieg), den Jubiläumsfond der österreichischen Zentralbank (Studie über IM in der katholischen Kirche) und die Landesregierung von Niederösterreich (Studie über IM in Niederösterreich). Für keinen der Autoren besteht ein Interessenskonflikt.

### Literatur

- American Psychiatric Association. (2000). *Diagnostic and Statistical Manual of Mental Disorders DSM-IV-TR Fourth Edition*. Washington, DC: American Psychiatric Association.
- American Psychiatric Association. (2013). *Diagnostic and Statistical Manual of Mental Disorders: DSM-5* (5th ed.). Washington, DC: American Psychiatric Association.
- Averill, P. M., & Beck, G. J. (2000). Posttraumatic stress disorder in older adults. *Journal of Anxiety Disorders, 14*, 133–156. doi:10.1016/S0887-6185(99)00045-6
- Beauducel, A., & Herzberg, P. Y. (2006). On the performance of maximum likelihood versus means and variance adjusted weighted least squares estimation in CFA. *Structural Equation Modeling, 13*, 186–203. doi:10.1207/s15328007sem1302\_2
- Bisson, J. I. (2013). What happened to harmonization of the PTSD diagnosis? The divergence of ICD11 and DSM5. *Epidemiology and Psychiatric Sciences, 22*, 205–207. doi:10.1017/S2045796013000164
- Blake, D. D., Weathers, F. W., Nagy, L. M., Kaloupek, D. G., Gusman, F. D., Charney, D. S., & Keane, T. M. (1995). The development of a clinician-administered PTSD scale. *Journal of Traumatic Stress, 8*, 75–90.
- Böttche, M., Kuwert, P., & Knaevelsrud, C. (2012). Posttraumatic stress disorder in older adults: an overview of characteristics and treatment approaches. *International Journal of Geriatric Psychiatry, 27*, 230–239. doi:10.1002/gps.2725
- Bramsen, I., & van der Ploeg, H. M. (1999). Fifty years later: the long-term psychological adjustment of ageing World War II survivors. *Acta Psychiatrica Scandinavica, 100*, 350–358.

- Brewin, C. R. (2013). "I wouldn't start from here" – An alternative perspective on PTSD from the ICD-11: Comment on Friedman (2013). *Journal of Traumatic Stress*, 26, 557–559. doi:10.1002/jts.21843
- Briere, J., Kaltman, S., & Green, B. L. (2008). Accumulated childhood trauma and symptom complexity. *Journal of Traumatic Stress*, 21, 223–226. doi:10.1002/jts.20317
- Cloitre, M., Garvert, D. W., Brewin, C. R., Bryant, R. A., & Maercker, A. (2013). Evidence for proposed ICD-11 PTSD and complex PTSD: A latent profile analysis. *European Journal of Psychotraumatology*, 4. doi:10.3402/ejpt.v4i0.20706
- Cloitre, M., Stolbach, B. C., Herman, J. L., van der Kolk, B., Pynoos, R., Wang, J., & Petkova, E. (2009). A developmental approach to complex PTSD: Childhood and adult cumulative trauma as predictors of symptom complexity. *Journal of Traumatic Stress*, 22, 399–408. doi:10.1002/jts.20444
- Forbes, D., Lockwood, E., Creamer, M., Bryant, R. A., McFarlane, A. C., Silove, D., . . . O'Donnell, M. (2015). Latent structure of the proposed ICD-11 post-traumatic stress disorder symptoms: Implications for the diagnostic algorithm. *The British Journal of Psychiatry*, 206, 245–251. doi:10.1192/bjp.bp.114.150078
- Franke, G. H., & Derogatis, L. R. (2000). *BSI: The Brief Symptom Inventory von L.R. Derogatis (Kurzform der SCL 90-R) - Deutsche Version*. Göttingen: Beltz Test.
- Freitag, S., Braehler, E., Schmidt, S., & Glaesmer, H. (2013). The impact of forced displacement in World War II on mental health disorders and health-related quality of life in late life - a German population-based study. *International Psychogeriatrics*, 25, 310–319.
- Friedman, M. J. (2013). PTSD in the DSM-5: Reply to Brewin (2013), Kilpatrick (2013), and Maercker and Perkonig (2013). *Journal of Traumatic Stress*, 26, 567–569. doi:10.1002/jts.21847

- Glaesmer, H., Brahler, E., Gundel, H., & Riedel-Heller, S. G. (2011). The association of traumatic experiences and posttraumatic stress disorder with physical morbidity in old age: a German population-based study. *Psychosomatic Medicine*, 73, 401-406.
- Glück, T. M., Tran, U. S., & Lueger-Schuster, B. (2012). PTSD and trauma in Austria's elderly: Influence of wartime experiences, postwar zone of occupation, and life time traumatization on today's mental health status - an interdisciplinary approach. *European Journal of Psychotraumatology*, 3. doi:10.3402/ejpt.v3i0.17263
- Goodyer, I. M. (2012). Mathematical models as an aid for improving the validity of descriptive psychiatry. *The British Journal of Psychiatry*, 201, 335-336. doi:10.1192/bjp.bp.112.109538
- Hu, L., & Bentler, P. M. (1999). Cutoff criteria for fit indexes in covariance structure analysis: Conventional criteria versus new alternatives. *Structural Equation Modeling*, 6, 1-55. doi:10.1080/10705519909540118
- Kelley, L. P., Weathers, F. W., McDevitt-Murphy, M. E., Eakin, D. E., & Flood, A. M. (2009). A comparison of PTSD symptom patterns in three types of civilian trauma. *Journal of Traumatic Stress*, 22, 227-235. doi:10.1002/jts.20406
- Knefel, M., & Lueger-Schuster, B. (2013). An evaluation of ICD-11 PTSD and complex PTSD criteria in a sample of adult survivors of childhood institutional abuse. *European Journal of Psychotraumatology*, 4. doi:10.3402/ejpt.v4i0.22608
- Lancaster, S. L., Melka, S. E., Rodriguez, B. F., & Bryant, A. R. (2014). PTSD symptom patterns following traumatic and nontraumatic events. *Journal of Aggression, Maltreatment & Trauma*, 23, 414-429. doi:10.1080/10926771.2014.893276
- Lueger-Schuster, B., Kantor, V., Weindl, D., Knefel, M., Moy, Y., Butollo, A., . . . Glück, T. (2013). Institutional abuse of children in the Austrian Catholic Church: Types of abuse and

impact on adult survivors' current mental health. *Child Abuse & Neglect*, 38, 52–64.

doi:10.1016/j.chiabu.2013.07.013

Maercker, A., Brewin, C. R., Bryant, R. A., Cloitre, M., van Ommeren, M., Jones, L. M., . . .

Reed, G. M. (2013). Diagnosis and classification of disorders specifically associated with stress: Proposals for ICD-11. *World Psychiatry*, 12, 198–206. doi:10.1002/wps.20057

Muthén, L. K., & Muthén, B. O. (2010). *Mplus User's Guide: Statistical Analysis with Latent Variables*. LA: Muthén & Muthén.

Naifeh, J. A., North, T. C., Davis, J. L., Reyes, G., Logan, C. A., & Elhai, J. D. (2008).

Clinical profile differences between PTSD-diagnosed military veterans and crime victims. *Journal of Trauma & Dissociation*, 9, 321–334. doi:10.1080/15299730802139139

Noll-Hussong, M., Glaesmer, H., Herberger, S., Bernardy, K., Schonfeldt-Lecuona, C.,

Lukas, A., ... & Nikolaus, T. (2012). The grapes of war. Somatoform pain disorder and history of early war traumatization in older people. *Zeitschrift für Gerontologie und Geriatrie*, 45, 404–410.

O'Donnell, M. L., Alkemade, N., Nickerson, A., Creamer, M., McFarlane, A. C., Silove, D.,

Forbes, D. (2014). Impact of the diagnostic changes to post-traumatic stress disorder for DSM-5 and the proposed changes to ICD-11. *The British Journal of Psychiatry*, 205, 230–235. doi:10.1192/bjp.bp.113.135285

Ogle, C. M., Rubin, D. C., & Siegler, I. C. (2013). The impact of the developmental timing of trauma exposure on PTSD symptoms and psychosocial functioning among older adults.

*Developmental Psychology*, 49, 2191–2200. doi:10.1037/a0031985

Ohayon, M. M., Carskadon, M. A., Guilleminault, C., & Vitiello, M. V. (2004). Meta-analysis of quantitative sleep parameters from childhood to old age in healthy individuals:

Developing normative sleep values across the human lifespan. *Sleep*, 27, 1255–1273.



- Pietrzak, R. H., Goldstein, R. B., Southwick, S. M., & Grant, B. F. (2012). Physical health conditions associated with posttraumatic stress disorder in U.S. older adults: results from wave 2 of the National Epidemiologic Survey on Alcohol and Related Conditions. *Journal of the American Geriatrics Society*, 60, 296-303.
- Reed, G. M. (2010). Toward ICD-11: Improving the clinical utility of WHO's International Classification of mental disorders. *Professional Psychology: Research and Practice*, 41, 457–464. doi:10.1037/a0021701
- Stein, D. J., McLaughlin, K. A., Koenen, K. C., Atwoli, L., Friedman, M. J., Hill, E. D., . . . Kessler, R. C. (2014). DSM-5 and ICD-11 definitions of posttraumatic stress disorder: Investigating „narrow“ and „broad“ approaches. *Depression and Anxiety*, 31, 494–505. doi:10.1002/da.22279
- Tay, A. K., Rees, S., Chen, J., Kareth, M., & Silove, D. (2015). The structure of post-traumatic stress disorder and complex post-traumatic stress disorder amongst West Papuan refugees. *BMC Psychiatry*, 15, 111–128. doi:10.1186/s12888-015-0480-3
- Vermunt, J. K., & Magidson, J. (2005). *Latent GOLD 4.0 user's guide*. Belmont, Massachusetts: Statistical Innovations Inc.
- Weathers, F. W., Litz, B. T., Herman, D., Huska, J., & Keane, T. M. (1991). *The PTSD checklist–civilian version (PCL-C)*. FW Weathers National Center for PTSD, Boston Veterans Affairs Medical Center 150 S. Huntington Avenue; Boston, MA, 2130.
- World Health Organization. (1992). *The ICD-10 classification of mental and behavioural disorders: Clinical descriptions and diagnostic guidelines*. Geneva: World Health Organization.
- Yehuda, R., Schmeidler, J., Labinsky, E., Bell, A., Morris, A., Zelman, S., & Grossman, R. A. (2009). Ten-year follow-up study of PTSD diagnosis, symptom severity, and

psychosocial indices in aging Holocaust survivors. *Acta Psychiatrica Scandinavica*, 119, 25-34.

Yufik, T., & Simms, L. J. (2010). A meta-analytic investigation of the structure of posttraumatic stress disorder symptoms. *Journal of Abnormal Psychology*, 119, 764–776.  
doi:10.1037/a00209
